# Supplementary material
Source: Springer Nature journal article supplement (https://www.springermedizin.de/resource/supplementary/13019_2012_804_MOESM1_ESM.pdf/9639112)

# The CONSORT E-Flowchart

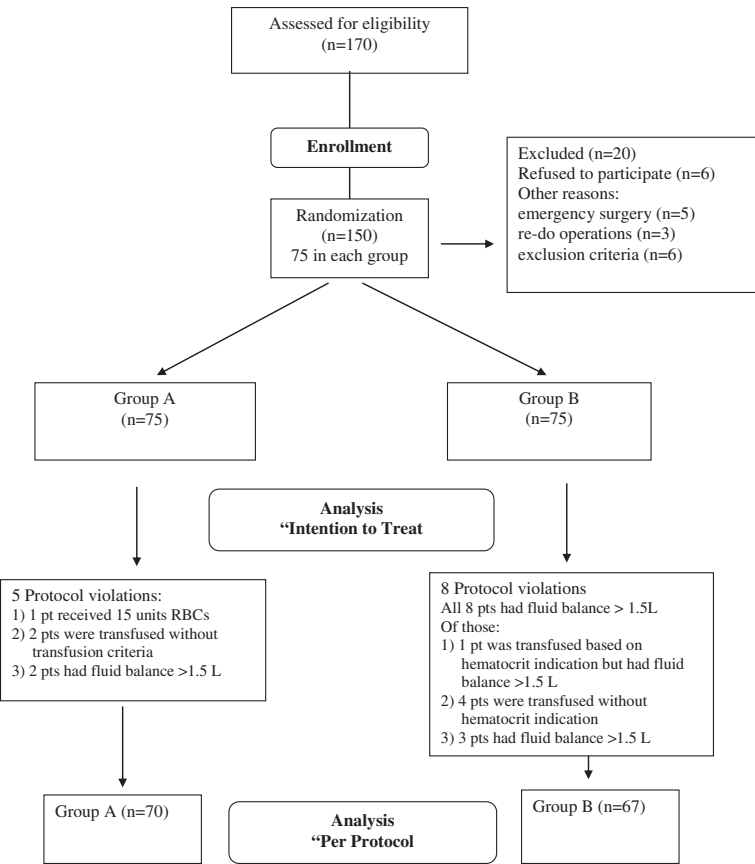

Supplement: MOESM1 [file 9639112]
